# Supplementary material for: Glial pathology and retinal neurotoxicity in the anterior visual pathway in experimental autoimmune encephalomyelitis
Source: PubMed Central journal article supplement (PMC6670238; doi:10.1186/s40478-019-0767-6), 2019-07-31

**Figure S6.**

**a**

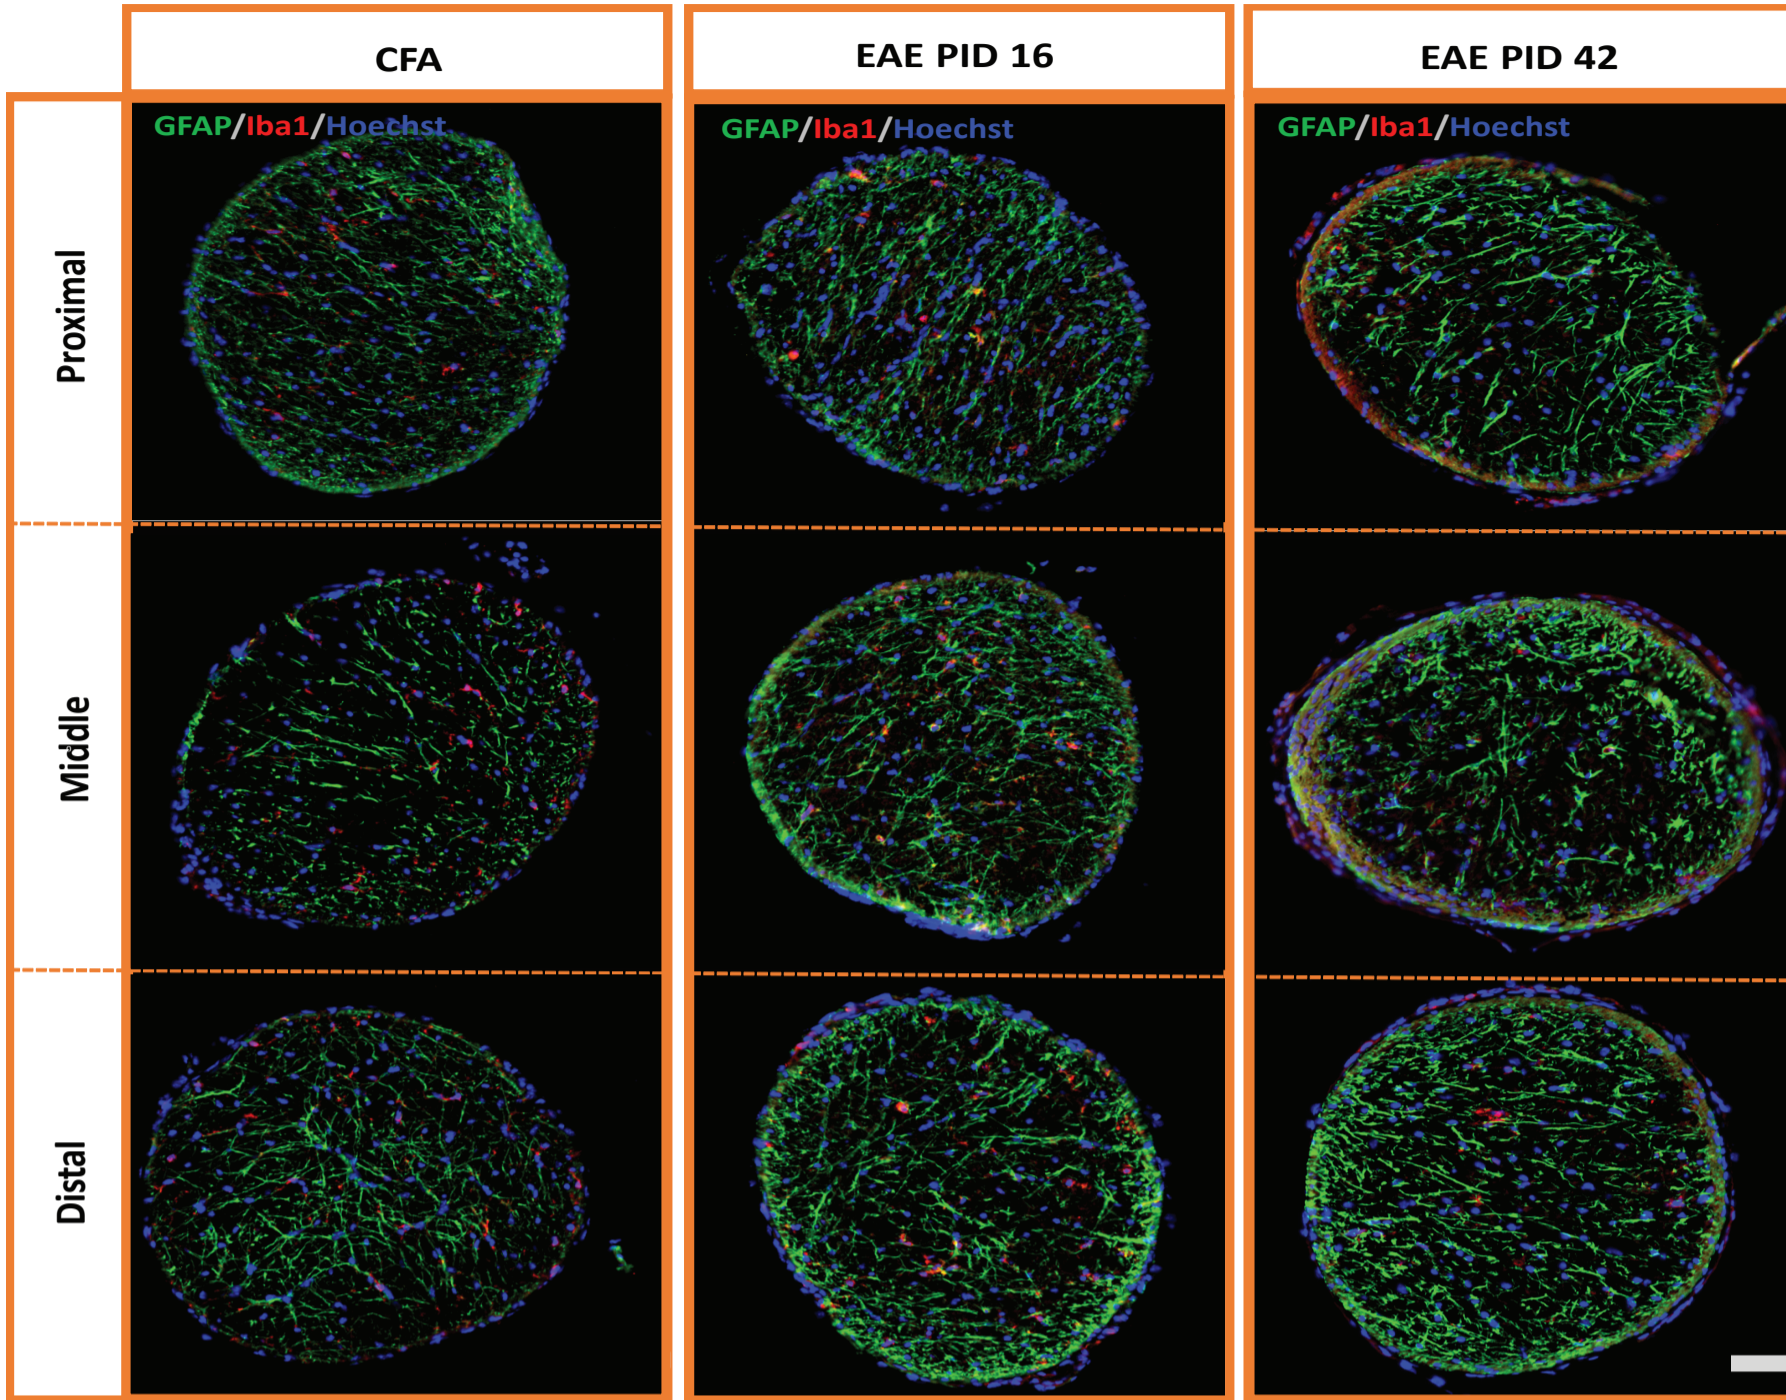

**b**

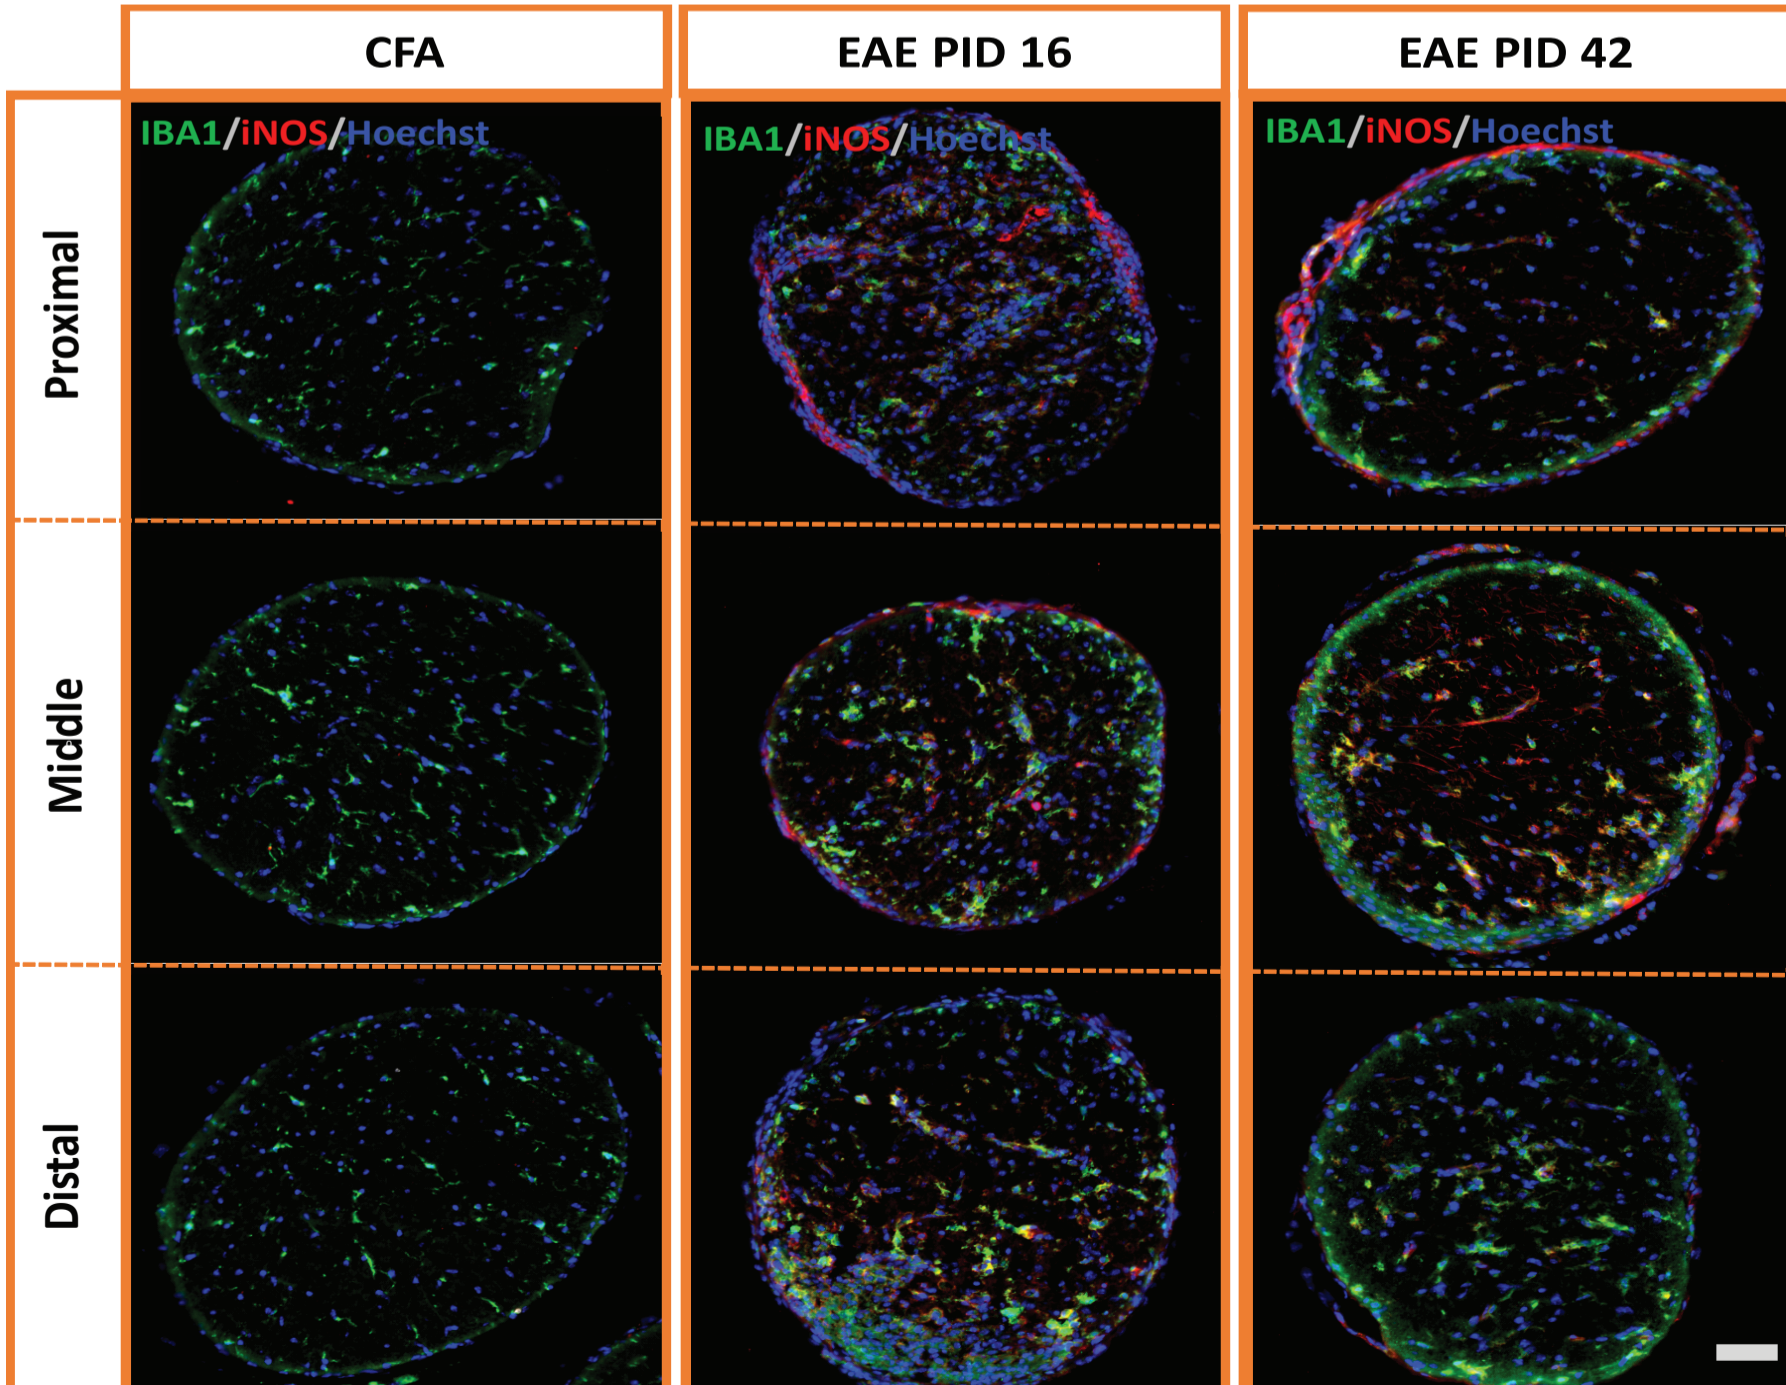

Supplement: 40478_2019_767_MOESM6_ESM.pdf [file 40478_2019_767_MOESM6_ESM.pdf]
